# Supplementary material for: PLK1-mediated phosphorylation of β-catenin enhances its stability and transcriptional activity for extracellular matrix remodeling in metastatic NSCLC
Source: PubMed Central journal article supplement (PMC9925311; doi:10.7150/thno.79318), 2023-02-05
Supplement: thnov13p1198s1.pdf [file thnov13p1198s1.pdf]

# Supplementary Information

## **PLK1-mediated phosphorylation of $\beta$ -catenin enhances its stability and transcriptional activity for extracellular matrix remodeling in metastatic NSCLC**

Da-Eun Kim<sup>1</sup>, Sol-Bi Shin<sup>1</sup>, Chang-Hyeon Kim<sup>1</sup>, Yeo-Bin Kim<sup>1</sup>, Hyun-Ji Oh<sup>1</sup>, and Hyungshin Yim<sup>1,2\*</sup>

<sup>1</sup>Department of Pharmacy, College of Pharmacy, Hanyang University, Ansan, Gyeonggi-do 15588, Korea

<sup>2</sup>Institute of Pharmaceutical Science and Technology, Hanyang University, Ansan, Gyeonggi-do 15588, Korea

\* Corresponding author

Hyungshin YIM

Address: Department of Pharmacy, College of Pharmacy, Institute of Pharmaceutical Science and Technology, Hanyang University, Ansan, Gyeonggi-do 15588, Korea

Phone: +82-31-400-5810

Fax: +82-31-400-5958

E-mail: [hsyim@hanyang.ac.kr](mailto:hsyim@hanyang.ac.kr)

# Supplementary Figure S1

**A**

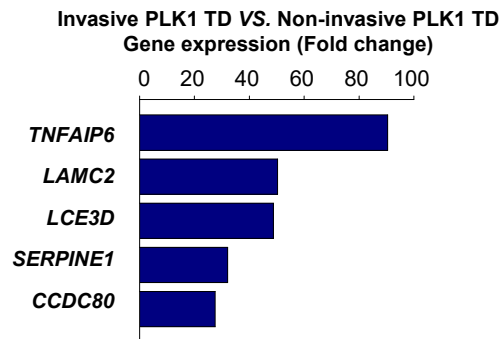

**B**

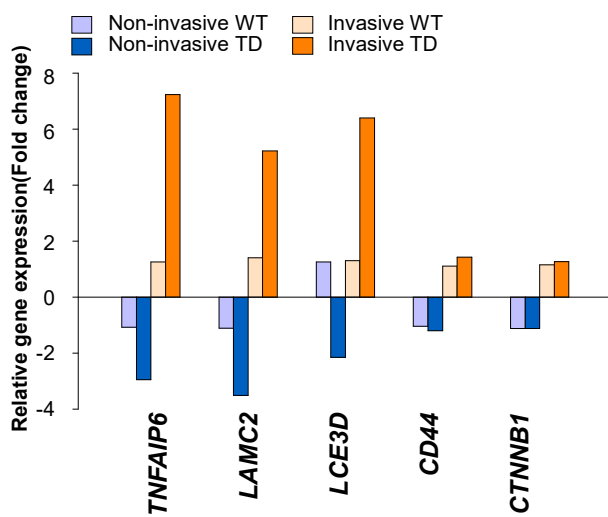

**C**

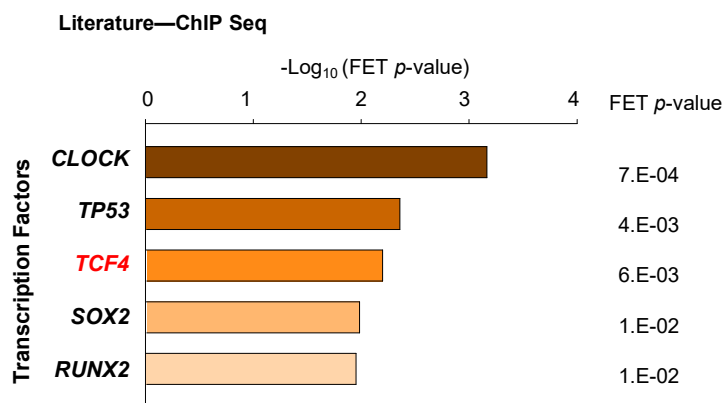

**Supplementary Figure S1. Upregulation of ECM adhesion factors in active PLK1-driven EMT. A-B,** A549 cells expressing wild-type (WT) or a constitutively active version of PLK1 (T210D; TD) were cultured in a three-dimensional Transwell <sup>1</sup>. **A,** Reanalysis of the relative gene expression profile of the top five genes was analyzed, normalized, and plotted in invasive A549 cells expressing TD mutant of PLK1 vs. non-invasive A549 cells expressing TD mutant of PLK1, using previously published microarray data <sup>1</sup>. **B,** Reanalysis of relative gene expression levels of the *TNFAIP6*, *LAMC2*, *LCE3D*, *CD44*, and *CTNNB1* in invasive and non-invasive cells expressing WT and TD, respectively, using previously published microarray data <sup>1</sup>. **C,** Prediction of transcriptional factors of top 30 genes in the invasive TD/non-invasive TD of PLK1 <sup>1</sup> was performed, and the top five were extracted from APPYTER.

# Supplementary Figure S2

## A

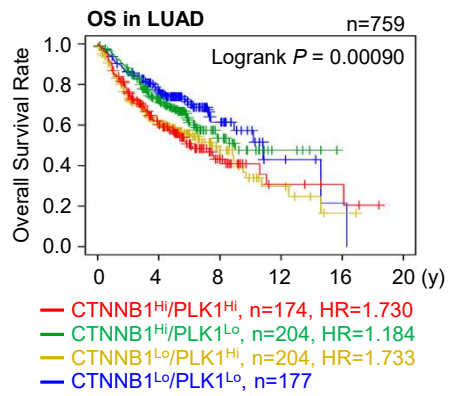

## B

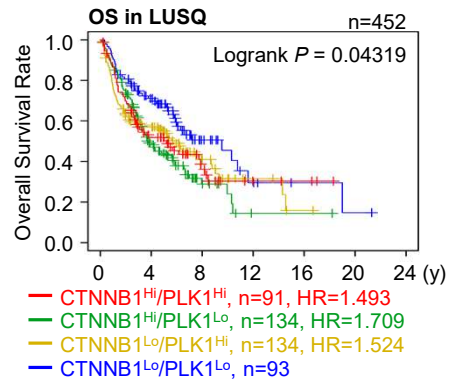

**Supplementary Figure S2. Relevance of PLK1 and  $\beta$ -catenin in LUAD and LUSQ.**

**A-B**, The overall survival (OS) times in LUAD patients ( $n=759$ , Log-rank  $P = 0.00090$ ) (**A**) and LUSQ patients ( $n=452$ , Log-rank  $P = 0.04319$ ) (**B**), were analyzed according to their *PLK1* and *CTNNB1* expression levels. High (Hi) and low (Lo) were generated by dividing patients according to their expression at the median cut-off.

# Supplementary Figure S3

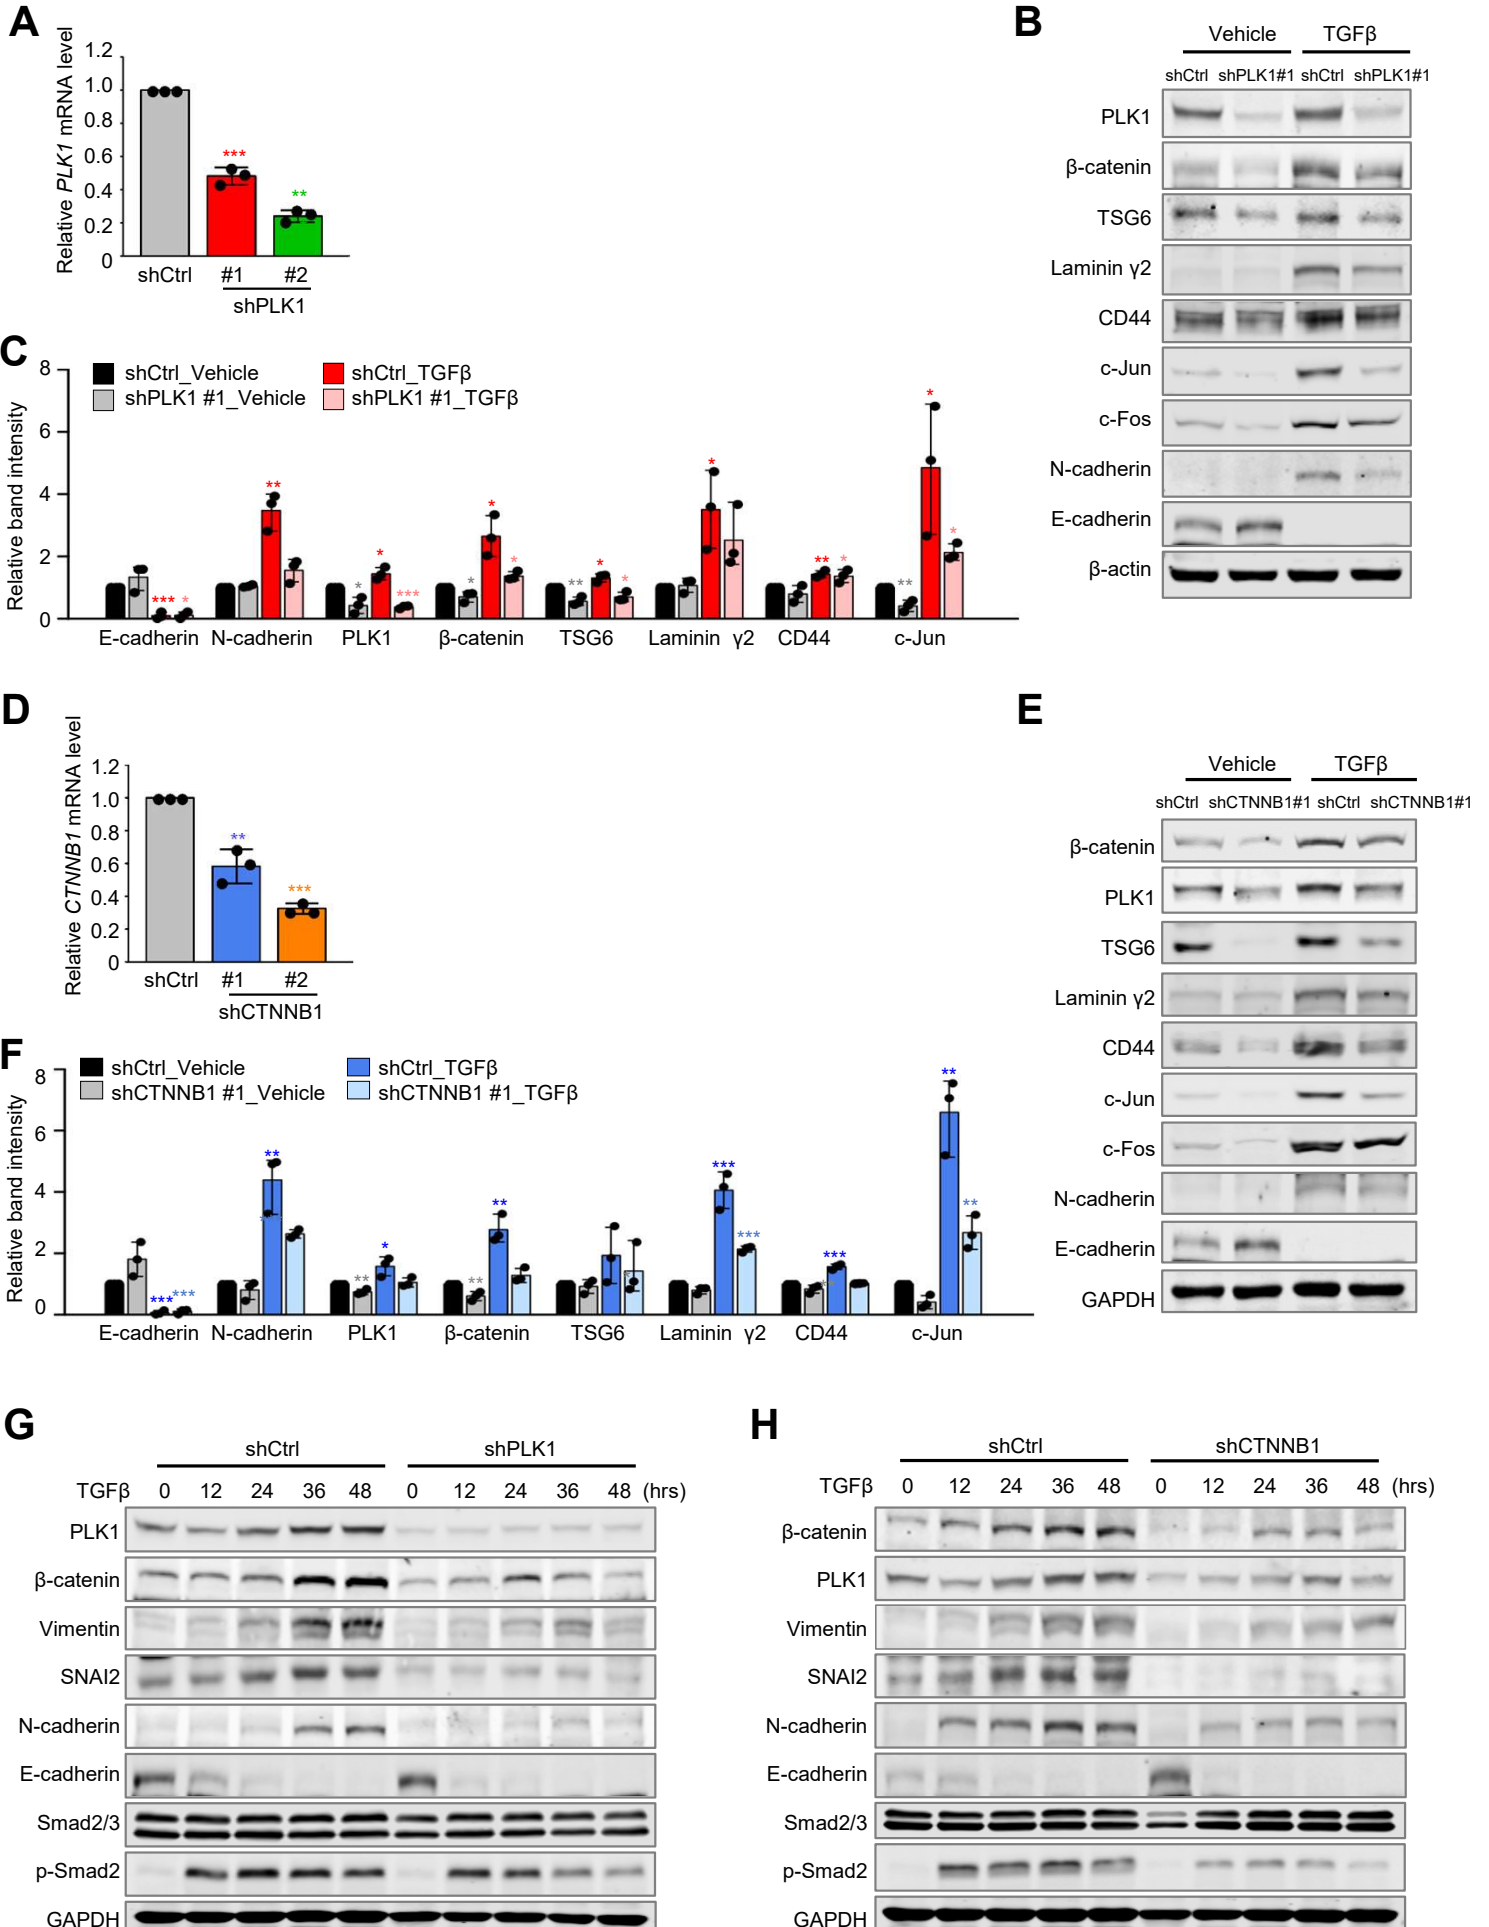

**Supplementary Figure S3. Depletion of PLK1 or  $\beta$ -catenin downregulates the expression of TSG6, laminin  $\gamma$ 2, CD44, and N-cadherin in TGF- $\beta$ -induced EMT.** **A**, PLK1-depleted cells using specific shRNAs targeting human *PLK1* (shPLK1 #1 and #2). qRT-PCR was performed for *PLK1* expression in A549 cells with depleted PLK1. **B-C**, Immunoblotting was performed using specific antibodies for PLK1,  $\beta$ -catenin, TSG6, laminin  $\gamma$ 2, CD44, c-Jun, c-Fos, N-cadherin, E-cadherin, and  $\beta$ -actin. The band intensity values were using densitometry of Photoshop software, normalized, and plotted (**C**) \* $p$  <0.05; \*\* $p$  <0.01; \*\*\* $p$  <0.001; ( $n$ =3). Data are presented as mean  $\pm$  SD. **D**,  $\beta$ -catenin-depleted cells using specific shRNAs targeting human *CTNNB1* (shCTNNB1 #1 and #2). qRT-PCR was performed for *CTNNB1* expression in A549 cells with depleted *CTNNB1*. **E-F**, Immunoblotting was performed using specific antibodies for  $\beta$ -catenin, PLK1, TSG6, laminin  $\gamma$ 2, CD44, c-Jun, c-Fos, N-cadherin, E-cadherin, and GAPDH. The band intensity values were using densitometry of Photoshop software, normalized, and plotted (**F**) \* $p$  <0.05; \*\* $p$  <0.01; \*\*\* $p$  <0.001; ( $n$ =3). Data are presented as mean  $\pm$  SD. **G-H**, PLK1- or  $\beta$ -catenin-depleted cells using specific shPLK1 #2 or shCTNNB1 #2 were treated with TGF- $\beta$  in A549 cells for 48 hours. Cells were prepared in a time-dependent manner at the indicated time. Immunoblotting was performed using specific antibodies for PLK1,  $\beta$ -catenin, vimentin, SNAI2, N-cadherin, E-cadherin, p-Smad2, Smad2/3, and GAPDH.

# Supplementary Figure S4

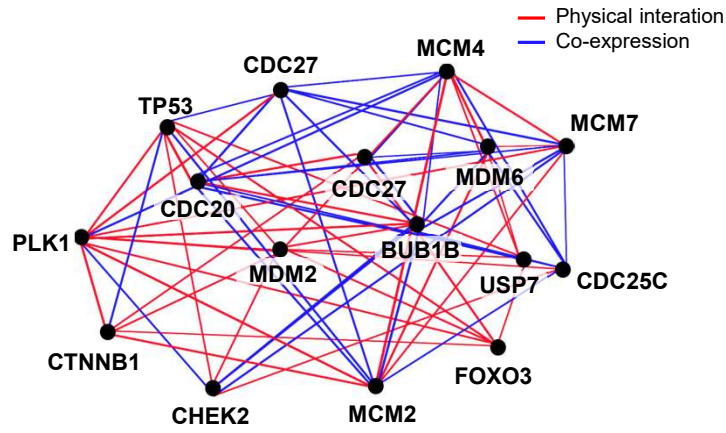



**Supplementary Figure S4. The interactome analysis for PLK1 and  $\beta$ -catenin.** The interactome analysis for PLK1 and  $\beta$ -catenin, which were extracted from GeneMANIA.

# Supplementary Figure S5

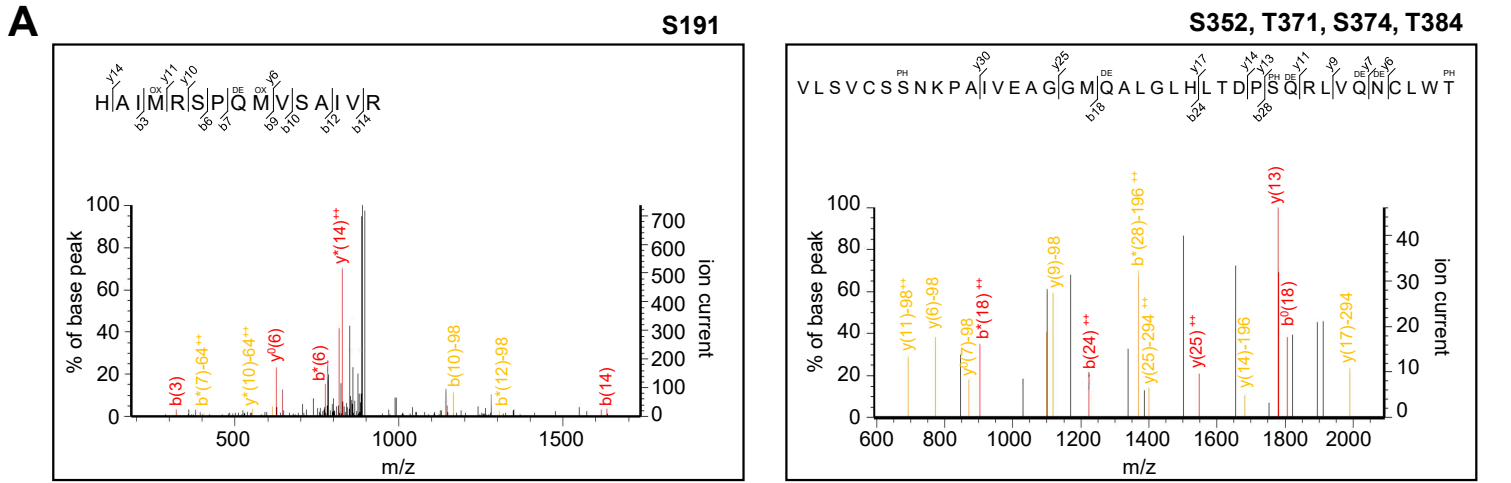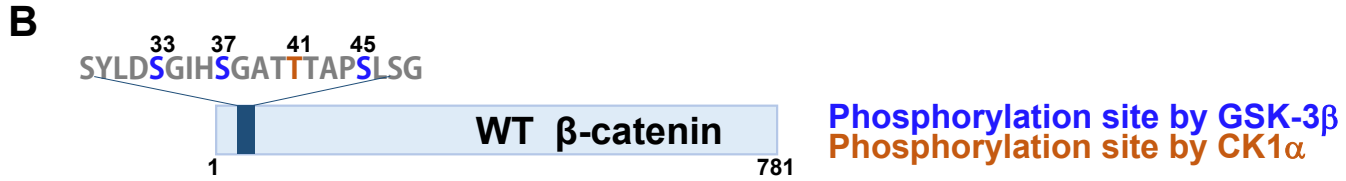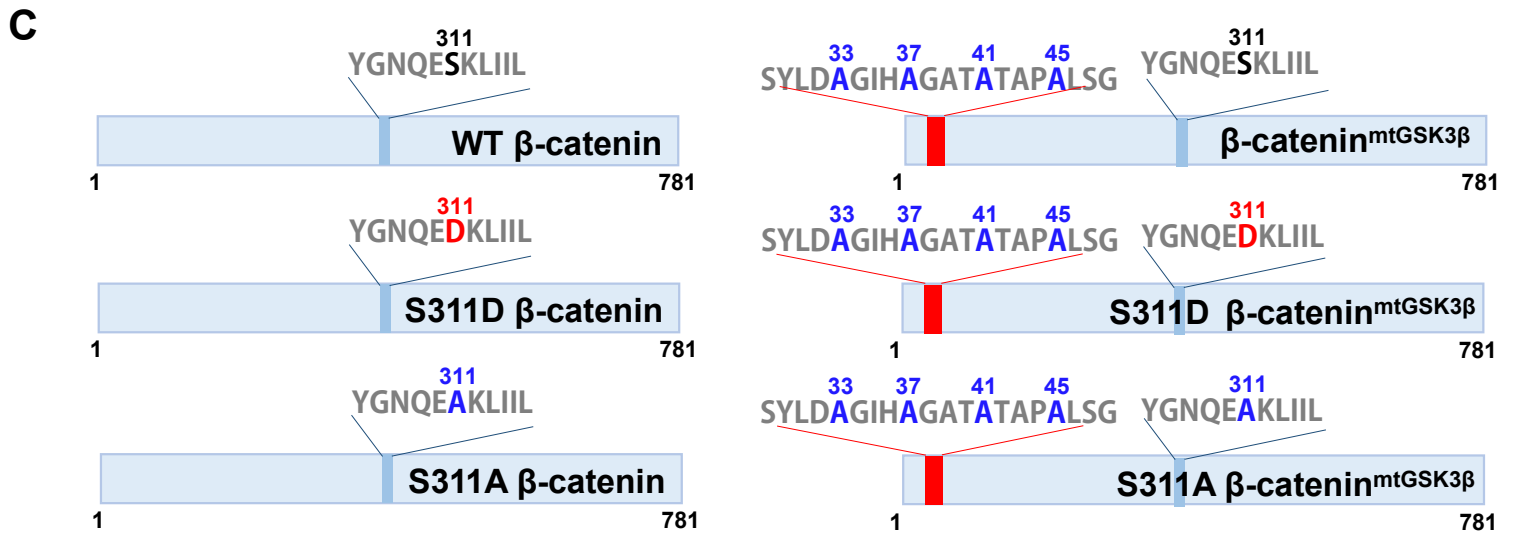

**D**

| SPECIES                        | MOTIF               |
|--------------------------------|---------------------|
| <i>Homo sapiens</i>            | 306 YGNQESKLIIL 316 |
| <i>Pan Troglodytes</i>         | 306 YGNQESKLIIL 316 |
| <i>Macaca mulatta</i>          | 306 YGNQESKLIIL 316 |
| <i>Canis lupus familiaris</i>  | 296 YGNQESKLIIL 306 |
| <i>Mus musculus</i>            | 306 YGNQESKLIIL 316 |
| <i>Xenopus tropicalis</i>      | 292 YGNQESKLIIL 302 |
| <i>Rattus norvegicus</i>       | 306 YGNQESKLIIL 316 |
| <i>Danio rerio</i>             | 305 YGNQESKLIIL 315 |
| <i>Dorsophila melanogaster</i> | 314 YGNQESKLIIL 324 |

**Supplementary Figure S5. Phosphorylation of  $\beta$ -catenin by PLK1.** **A,** In the LC-MS/MS analysis, possible phosphorylation residues of  $\beta$ -catenin by PLK1 were detected at S191, T298, S311, S352, T371, S374, and T384. The LC/MS-MS data for T298 and S311 are shown in Figure 3E. **B,** The phosphorylation residues of  $\beta$ -catenin by GSK-3 $\beta$  and CK1 $\alpha$ <sup>2,3</sup>. **C,** The scheme of various version of  $\beta$ -catenin and  $\beta$ -catenin<sup>mtGSK3 $\beta$</sup>  structure. **D,** The plausible phosphorylation residues of  $\beta$ -catenin by PLK1 at Ser311 is evolutionarily conserved in several species.

# Supplementary Figure S6

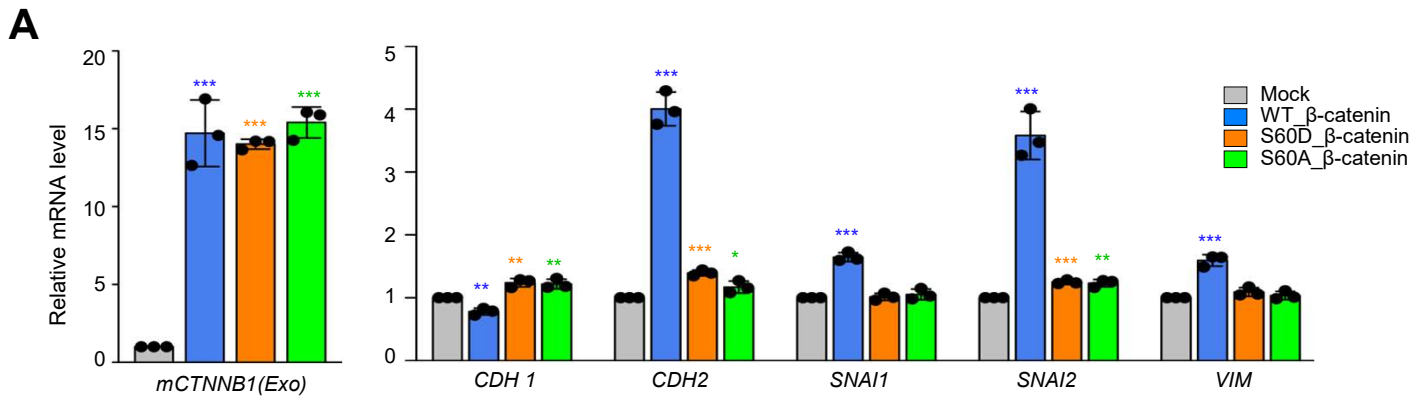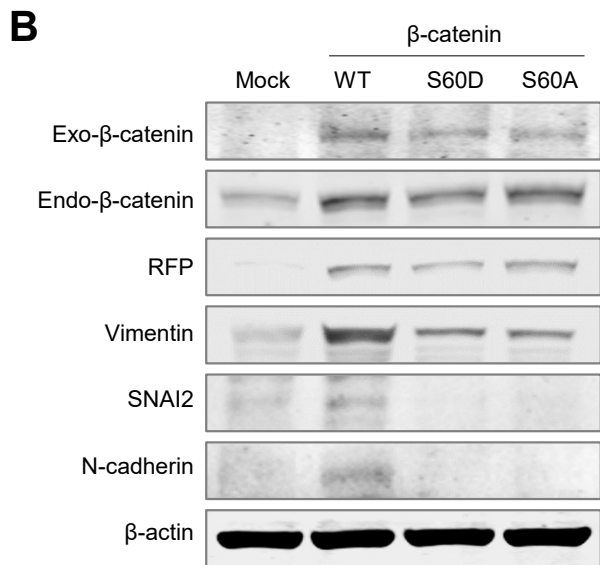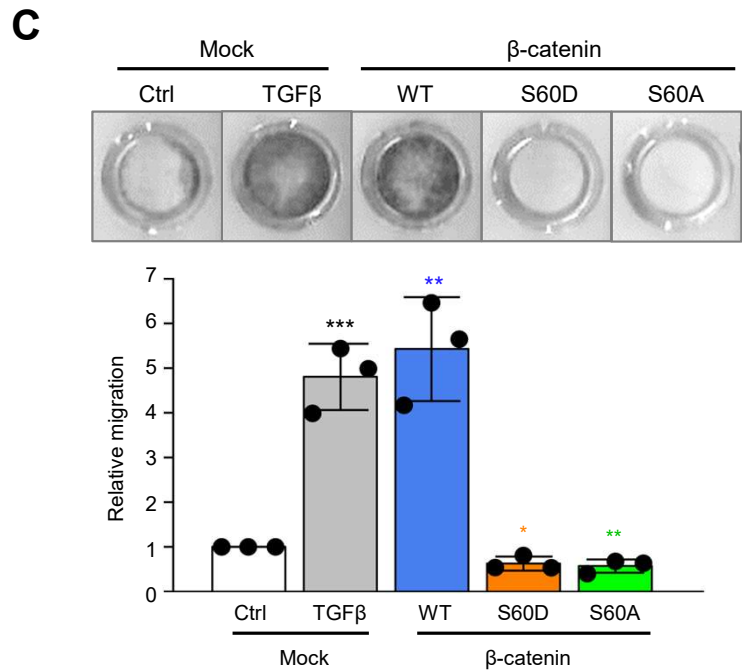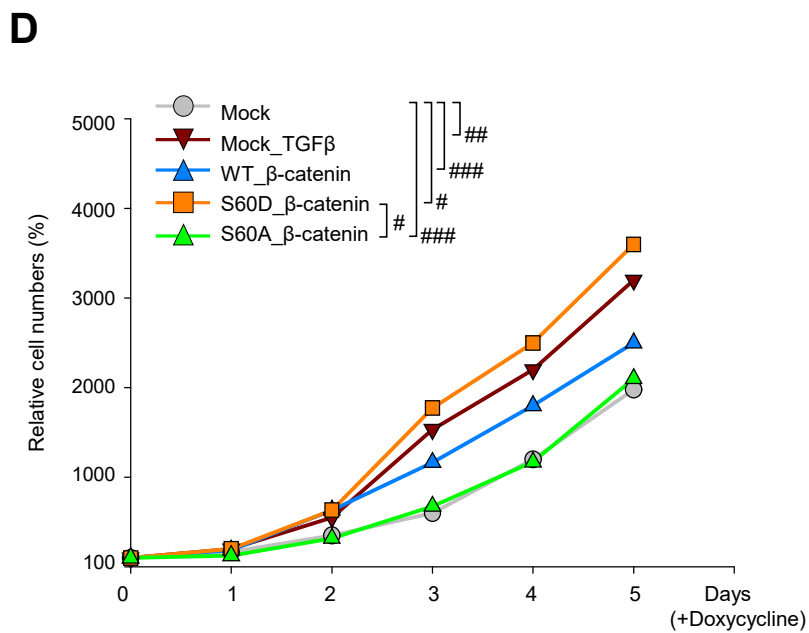

**Supplementary Figure S6. Phosphorylation of  $\beta$ -catenin at Ser60 did not regulate EMT.**

The A549 cell expressing RFP-tagged WT, S60D, S60A of  $\beta$ -catenin was expressed for 48 hours using a doxycycline-inducible system. A549 cells were treated with doxycycline to express RFP-tagged  $\beta$ -catenin. **A**, qRT-PCR was performed for *CTNNB1*, *CDH1*, *CDH2*, *SNAIL*, *SNAI2*, and *VIM* in A549 cells expressing wild-type or mutant  $\beta$ -catenin. \* $p$  <0.05; \*\* $p$  <0.01; \*\*\* $p$  <0.001; ( $n=3$ ). Data are presented as mean  $\pm$  SD. **B**, Immunoblotting was performed using specific antibodies for  $\beta$ -catenin, RFP, vimentin, SNAI2, N-cadherin, and  $\beta$ -actin. The band intensity values were quantified using the densitometry of Photoshop software, normalized, and plotted. **C**, Cells expressing wild-type or mutants of  $\beta$ -catenin were subjected to a Transwell migration assay. As a positive control for migration, cells were treated with TGF- $\beta$ . Three days after seeding, the cells on the bottom layer surface were stained with 0.05% crystal violet dye. Images of the Transwell cell migration assay were collected and analyzed with an Odyssey infrared imaging system (LI-COR Biosciences) and plotted. \* $p$  <0.05; \*\* $p$  <0.01; \*\*\* $p$  <0.001 compared with experimental control. **D**, Cell proliferation assay was performed ( $n=3$ ). Data are presented as mean  $\pm$  SD of at least three independent experiments. #,  $p$  < 0.05; ##,  $p$  <0.01; ###,  $p$  <0.001 compared with indicated groups of cells.

# Supplementary Figure S7

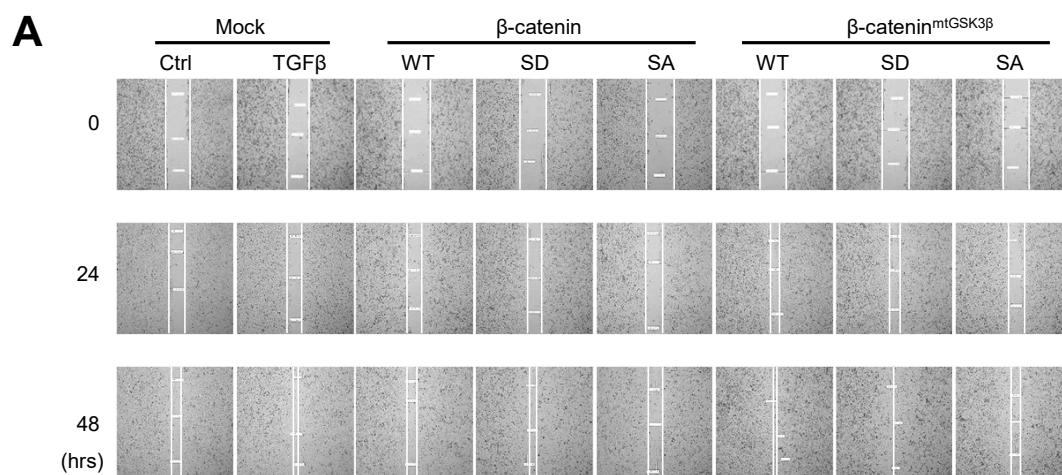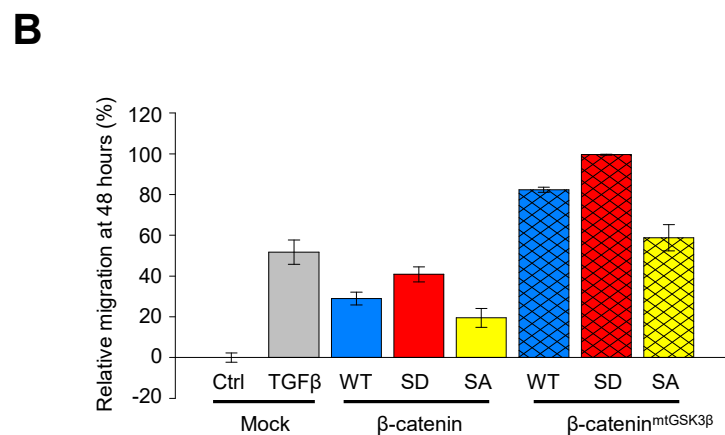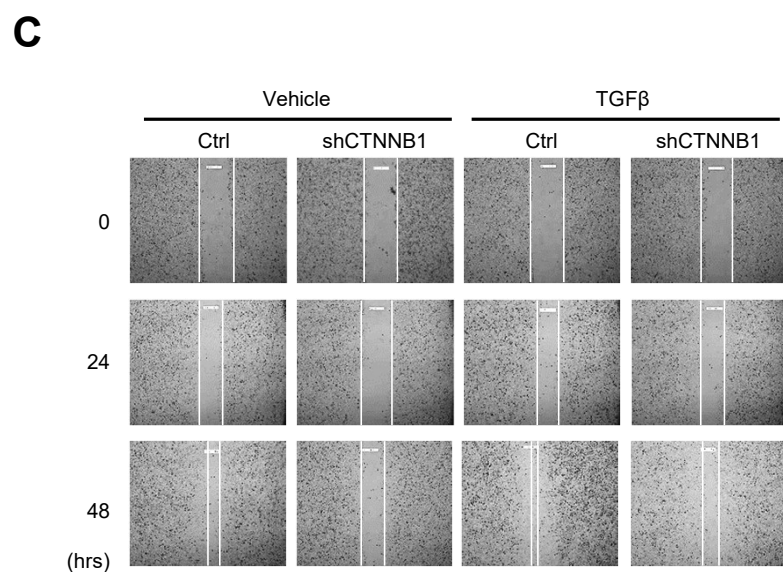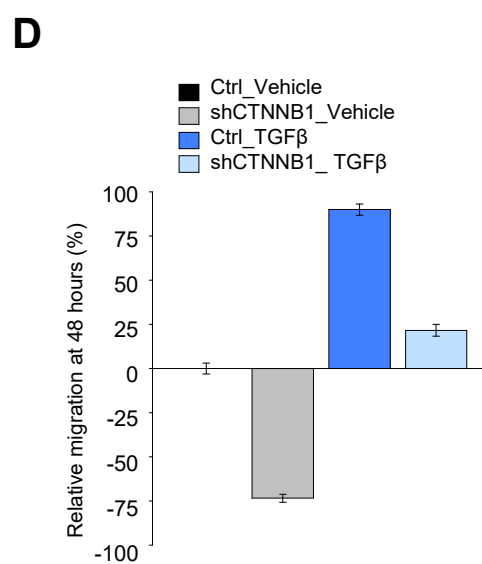

**Supplementary Figure S7. Phosphorylated  $\beta$ -catenin promotes cell mobility of NSCLC.**

**A-B**, RFP-tagged wild-type (WT), S311D, or S311A of  $\beta$ -catenin and WT, S311, S311D, or S311A of  $\beta$ -catenin<sup>mtGSK3 $\beta$</sup>  (S33/S37/T41/S45A) mutants were expressed in A549 cells. A549 cells were treated with doxycycline to express RFP-tagged  $\beta$ -catenin and subjected to a wound healing assay. **A**, The scratch recovery efficiency after 48 hours was analyzed using NIS-Elements Imaging software (Nikon, Japan). **B**, The relative migration distance was plotted compared with the control. Data presented as mean  $\pm$  SD. **C-D**, A549 cells were infected by lentiviral  $\beta$ -catenin shRNA (shCTNNB1 #2) and then treated with TGF- $\beta$  for 48 hours. **C**, The scratch recovery efficiency after 48 hours was analyzed using NIS-Elements Imaging software (Nikon, Japan). **D**, The relative migration distance compared with the control was plotted. Data presented as mean  $\pm$  SD.

# Supplementary Figure S8

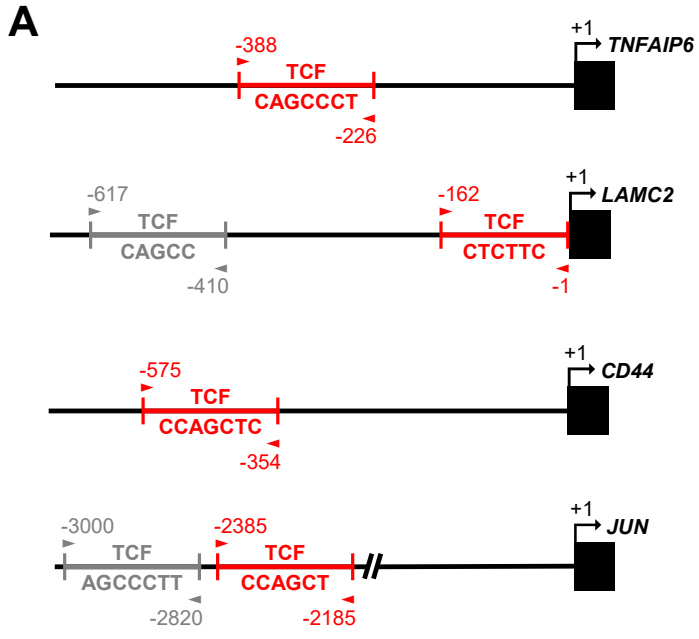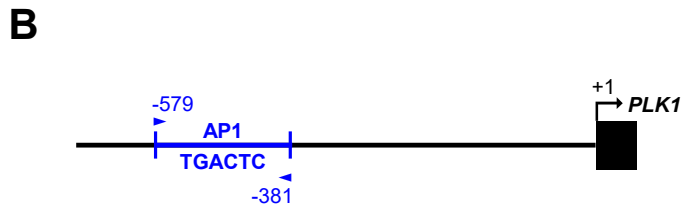



**Supplementary Figure S8. Scheme of the promoter regions for ChIP assay.**

**A,** Scheme of TCF4 binding regions in the promoter of *LAMC2*, *CD44*, *JUN*, and *TNFAIP6*.

Based on TCF-binding elements characterized by a highly conserved consensus sequence with 5'-C(G/C)AGC(T/C)CTTC-3'<sup>4,5</sup>, the TCF4 binding regions were displayed in the promoter of

*LAMC2*, *CD44*, *JUN*, and *TNFAIP6*. **B,** Scheme of c-Jun binding regions in the promoter of

*PLK1*. Based on AP-1-binding elements (5'-TGAG/CTCA-3')<sup>6</sup>, the AP-1 binding regions were

displayed in the promoter of *PLK1*.

## Supplementary Tables

**Supplementary Table S1. Correlation between PLK1 and CTNNB1 expression and prognosis in various clinicopathological subsets of NSCLC.**

| Patients  | Clinicopathologic Factors | Gene expression                          | Number of patients (n) | Hazard Ratio (HR) | 95% Confidential interval (CI) | <i>p</i> -Value |
|-----------|---------------------------|------------------------------------------|------------------------|-------------------|--------------------------------|-----------------|
| NSCLC     | Whole data                | CTNNB1 <sup>Hi</sup> /PLK1 <sup>Hi</sup> | 272                    | 1.590             | 1.243 – 2.035                  | 0.00023         |
|           |                           | CTNNB1 <sup>Hi</sup> /PLK1 <sup>Lo</sup> | 372                    | 1.276             | 1.005 – 1.620                  | 0.04508         |
|           |                           | CTNNB1 <sup>Lo</sup> /PLK1 <sup>Hi</sup> | 371                    | 1.601             | 1.268 – 2.022                  | 7.68e-05        |
|           |                           | CTNNB1 <sup>Lo</sup> /PLK1 <sup>Lo</sup> | 277                    | -                 | -                              | -               |
| Stage     | 1                         | CTNNB1 <sup>Hi</sup> /PLK1 <sup>Hi</sup> | 105                    | 2.143             | 1.316 – 3.49                   | 0.00218         |
|           |                           | CTNNB1 <sup>Hi</sup> /PLK1 <sup>Lo</sup> | 155                    | 1.621             | 1.01 – 2.603                   | 0.04541         |
|           |                           | CTNNB1 <sup>Lo</sup> /PLK1 <sup>Hi</sup> | 155                    | 1.872             | 1.175 – 2.982                  | 0.00828         |
|           |                           | CTNNB1 <sup>Lo</sup> /PLK1 <sup>Lo</sup> | 107                    | -                 | -                              | -               |
|           | 3 and 4                   | CTNNB1 <sup>Hi</sup> /PLK1 <sup>Hi</sup> | 9                      | 5.346             | 1.392 – 20.524                 | 0.0146          |
|           |                           | CTNNB1 <sup>Hi</sup> /PLK1 <sup>Lo</sup> | 16                     | 2.759             | 0.777 – 9.798                  | 0.1165          |
|           |                           | CTNNB1 <sup>Lo</sup> /PLK1 <sup>Hi</sup> | 16                     | 1.738             | 0.482 – 6.267                  | 0.3984          |
|           |                           | CTNNB1 <sup>Lo</sup> /PLK1 <sup>Lo</sup> | 7                      | -                 | -                              | -               |
| Histology | LUAD                      | CTNNB1 <sup>Hi</sup> /PLK1 <sup>Hi</sup> | 174                    | 1.730             | 1.232 – 2.430                  | 0.00157         |
|           |                           | CTNNB1 <sup>Hi</sup> /PLK1 <sup>Lo</sup> | 204                    | 1.184             | 0.835 – 1.679                  | 0.34270         |
|           |                           | CTNNB1 <sup>Lo</sup> /PLK1 <sup>Hi</sup> | 204                    | 1.733             | 1.243 – 2.417                  | 0.00119         |
|           |                           | CTNNB1 <sup>Lo</sup> /PLK1 <sup>Lo</sup> | 177                    | -                 | -                              | -               |
|           | LUSQ                      | CTNNB1 <sup>Hi</sup> /PLK1 <sup>Hi</sup> | 91                     | 1.493             | 0.991 – 2.249                  | 0.05537         |
|           |                           | CTNNB1 <sup>Hi</sup> /PLK1 <sup>Lo</sup> | 134                    | 1.709             | 1.173 – 2.489                  | 0.00528         |
|           |                           | CTNNB1 <sup>Lo</sup> /PLK1 <sup>Hi</sup> | 134                    | 1.524             | 1.040 – 2.232                  | 0.03069         |
|           |                           | CTNNB1 <sup>Lo</sup> /PLK1 <sup>Lo</sup> | 93                     | -                 | -                              | -               |

**Supplementary Table S2. Sequences of forward (F) and reverse (R) primers used for RT-PCR amplification.**

| Target Gene          | Primer  | Sequences                           |
|----------------------|---------|-------------------------------------|
| Human <i>CTNNB1</i>  | Forward | 5'- CCTTGGATATCGCCAGGA - 3'         |
|                      | Reverse | 5'- GCAGCCCATCAACTGGAT - 3'         |
| Mouse <i>Ctnnb1</i>  | Forward | 5'- CCTTGGATATCGCCAGGA - 3'         |
|                      | Reverse | 5'- GCAGCCCATCAACTGGAT - 3'         |
| Human <i>CDH1</i>    | Forward | 5'- ACCACCTCCACAGCCACC - 3'         |
|                      | Reverse | 5'- GTCCAGTTGGCACTCGCC - 3'         |
| Human <i>CDH2</i>    | Forward | 5'- ACAGTGGCCACCTACAAAGG - 3'       |
|                      | Reverse | 5'- CCGAGATGGGGTTGATAATG - 3'       |
| Human <i>TNFAIP6</i> | Forward | 5'- GTGGCGTCTTTACAGATCC - 3'        |
|                      | Reverse | 5'- CATCTCCACAGTATCTTCCC - 3'       |
| Human <i>LAMC2</i>   | Forward | 5'- GCCTTTTGGCACCTGTATTC - 3'       |
|                      | Reverse | 5'- CAGGATTCTCATCCCCTGAA - 3'       |
| Human <i>CD44</i>    | Forward | 5'- CTGAGCATCGGATTTGAGAC - 3'       |
|                      | Reverse | 5'- CATACTGGGAGGTGTTGGAT - 3'       |
| Human <i>PLK1</i>    | Forward | 5'- AAGAGATCCCGGAGGTCCTA - 3'       |
|                      | Reverse | 5'- TCATTCAGGAAAAGGTTGCC - 3'       |
| Mouse <i>Plk1</i>    | Forward | 5'- CGAGGATCTGGAGGTGAAAA - 3'       |
|                      | Reverse | 5'- TCTCTTTTAGGCACGAGGTC - 3'       |
| Human <i>JUN</i>     | Forward | 5'- ATCCTGAAACAGAGCATGAC - 3'       |
|                      | Reverse | 5'- GTTGCTGGACTGGATTATCA - 3'       |
| Human <i>VIM</i>     | Forward | 5'- GAGAACTTTGCCGTTGAAGC - 3'       |
|                      | Reverse | 5'- GCTTCCTGTAGGTGGCAATC - 3'       |
| Human <i>SNAI1</i>   | Forward | 5'- GGAAGCCTAACTACAGCGAG - 3'       |
|                      | Reverse | 5'- CAGAGTCCCAGATGAGCATTG - 3'      |
| Human <i>SNAI2</i>   | Forward | 5'- ACGCCCAGCTACCCAATG - 3'         |
|                      | Reverse | 5'- AGGGCGCCCAGGCTCACATA - 3'       |
| Human <i>ZEB1</i>    | Forward | 5'- TGGGATCAACCACCAATGG - 3'        |
|                      | Reverse | 5'- AAGTAACCCTGTGTATTTCTGGATGA - 3' |
| Human <i>TWIST</i>   | Forward | 5'- GGACAAGCTGAGCAAGATTCAGA - 3'    |
|                      | Reverse | 5'- TCTGGAGGACCTGGTAGAGGAA - 3'     |
| Human <i>GAPDH</i>   | Forward | 5'- TAAAGGGCATCCTGGGCTACACT - 3'    |
|                      | Reverse | 5'- TTAATCCTTGGAGGCCATGTAGG - 3'    |
| Mouse <i>Gapdh</i>   | Forward | 5'- GTTGTCTCCTGCGACTTCA - 3'        |
|                      | Reverse | 5'- GGTGGTCCAGGGTTTCTTA - 3'        |

**Supplementary Table S3. Sequences of forward (F) and reverse (R) primers used for site-directed mutagenesis of mouse  $\beta$ -catenin.**

| Target Residue | Primer  | Sequences                                            |
|----------------|---------|------------------------------------------------------|
| S191A          | Forward | 5'- ATGCCATCATGCGCGCCCCTCAGATGGTG- 3'                |
|                | Reverse | 5'- CACCATCTGAGGGGCGCGCATGATGGCAT- 3'                |
| T298A          | Forward | 5'- GTGAAATTCTTGGCTATTACAGCAGACTGCCTTCAGATC- 3'      |
|                | Reverse | 5'- GATCTGAAGGCAGTCTGCTGTAATAGCCAAGAATTTAC- 3'       |
| S311A          | Forward | 5'- AGCTTATGGCAATCAAGAGGCCAAGCTCATCATTCTGGCC - 3'    |
|                | Reverse | 5'- GGCCAGAATGATGAGCTTGGCCTCTTGATTGCCATAAGCT - 3'    |
| S311D          | Forward | 5'- AGCTTATGGCAATCAAGAGGACAAGCTCATCATTCTGGCC - 3'    |
|                | Reverse | 5'- GGCCAGAATGATGAGCTTGTCTCTTGATTGCCATAAGCT - 3'     |
| S352A          | Forward | 5'- GCTGTCTGTCTGCTCTGCCAACAAGCCGGCCATT- 3'           |
|                | Reverse | 5'- AATGGCCGGCTTGTGGCAGAGCAGACAGACAGC- 3'            |
| T371A          | Forward | 5'- CTGGGGCTTCATCTGGCAGACCCAAGTCAGC- 3'              |
|                | Reverse | 5'- GCTGACTTGGGTCTGCCAGATGAAGCCCCAG- 3'              |
| S374A          | Forward | 5'- GGCTTCATCTGACAGACCCAGCTCAGCGACTTGTCAA- 3'        |
|                | Reverse | 5'- TTGAACAAGTCGCTGAGCTGGGTCTGTCAGATGAAGCC- 3'       |
| T384A          | Forward | 5'- CTTGTTCAAACTGTCTTTGGGCTCTCAGAAACCTTTTCAGATG- 3   |
|                | Reverse | 5'- CATCTGAAAGGTTTCTGAGAGCCCAAAGACAGTTTTGAACAAG- 3'' |
| S60A           | Forward | 5'- GGAAGAAGATGTTGACACCGCCCAAGTCCTTTATGAATG - 3'     |
|                | Reverse | 5'- CATTATAAAGGACTTGGGCGGTGTCAACATCTTCTTCC - 3'      |
| S60D           | Forward | 5'- AGGAAGAAGATGTTGACACCGACCAAGTCCTTTATGAATGGG - 3'  |
|                | Reverse | 5'- CCCATTATAAAGGACTTGGTCGGGTGTCAACATCTTCTTCT - 3'   |

**Supplemental Table S4. Sequences of forward (F) and reverse (R) primers used for ChIP assay.**

| Target Gene          | Primer  | Sequences                       |
|----------------------|---------|---------------------------------|
| Human <i>LAMC2</i>   | Forward | 5' - ATTTTCCAGCCCGGTTTG - 3'    |
|                      | Reverse | 5' - GCCTTCCTTTTCCTTGATCAG - 3' |
| Human <i>CD44</i>    | Forward | 5' - AGAATGAGCTCTCCCTCTTTC - 3' |
|                      | Reverse | 5' - ACCATTGGGTTTCAGCCTTTG - 3' |
| Human <i>JUN</i>     | Forward | 5' - AAGCGCTATTTCCCTCTGCAG - 3' |
|                      | Reverse | 5' - CCCACAACGTCTTGAGAGAC - 3'  |
| Human <i>TNFAIP6</i> | Forward | 5' - CTTGTTTCAGTGCAGCCCTAT - 3' |
|                      | Reverse | 5' - ACTAGCTGAAAACCCAGCAA - 3'  |
| Human <i>PLK1</i>    | Forward | 5' - AGGCCCTGGGAAATTCAG - 3'    |
|                      | Reverse | 5' - GCCATCACCTGAGAGCTT - 3'    |

## References

1. Shin, S.B., Jang, H.R., Xu, R., Won, J.Y. & Yim, H. Active PLK1-driven metastasis is amplified by TGF-beta signaling that forms a positive feedback loop in non-small cell lung cancer. *Oncogene* **39**, 767-785 (2020).
2. Liu, C. *et al.* Control of beta-catenin phosphorylation/degradation by a dual-kinase mechanism. *Cell* **108**, 837-847 (2002).
3. van Noort, M., Meeldijk, J., van der Zee, R., Destree, O. & Clevers, H. Wnt signaling controls the phosphorylation status of beta-catenin. *J Biol Chem* **277**, 17901-17905 (2002).
4. Chang, Y.W. *et al.* Diverse Targets of beta-Catenin during the Epithelial-Mesenchymal Transition Define Cancer Stem Cells and Predict Disease Relapse. *Cancer Res* **75**, 3398-3410 (2015).
5. van de Wetering, M., Oosterwegel, M., Dooijes, D. & Clevers, H. Identification and cloning of TCF-1, a T lymphocyte-specific transcription factor containing a sequence-specific HMG box. *EMBO J* **10**, 123-132 (1991).
6. Shaulian, E. & Karin, M. AP-1 as a regulator of cell life and death. *Nat Cell Biol* **4**, E131-136 (2002).
